# Supplementary material for: An ultrathin bilayer membrane with asymmetric wettability for pressure responsive oil/water emulsion separation
Source: Royal Society of Chemistry journal article supplement (doi:10.1039/c5ta03975d), 2015-01-01
Supplement: c5ta03975d1.pdf [file c5ta03975d1.pdf]

## Supporting Information

### Ultrathin Bilayer Membrane with Asymmetric Wettability for Pressure Responsive Oil/Water Emulsion Separation

*Liang Hu, Shoujian Gao, Yuzhang Zhu, Feng Zhang, Lei Jiang, and Jian Jin\**

1. Photograph of a mixed cellulose ester (MCE) filter substrate supported bilayer membrane.

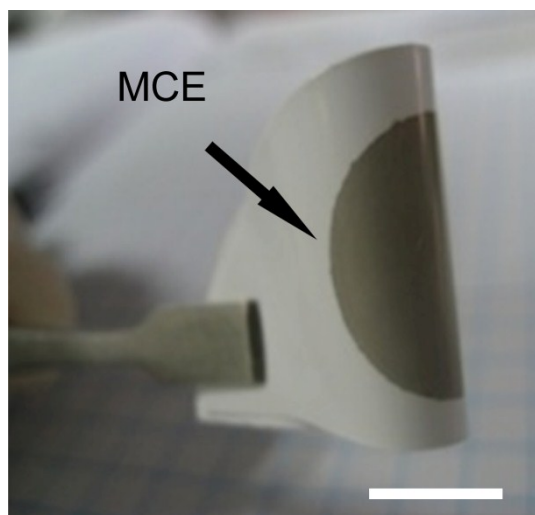

**Figure S1.** Photograph of a mixed cellulose ester filter substrate supported bilayer membrane. Scale bar = 1 cm.

2. Structure characterization of polydopamine-coated SWCNT ( $PS_{300}S_0$ ) and SWCNT ( $PS_0S_{50}$ ) membranes.

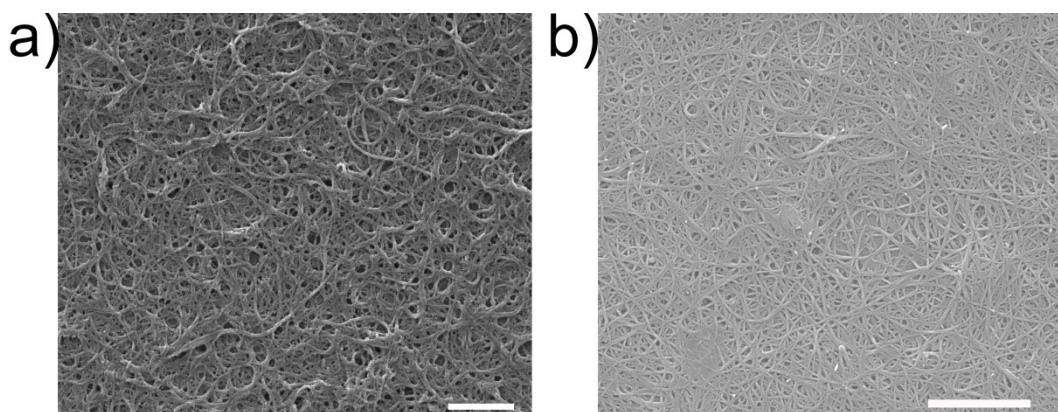

**Figure S2.** SEM images of polydopamine-coated SWCNT ( $PS_{300}S_0$ ) and SWCNT ( $PS_0S_{50}$ ) membranes. Scale bars = 1  $\mu$ m.

### 3. AFM images of bilayer membranes.

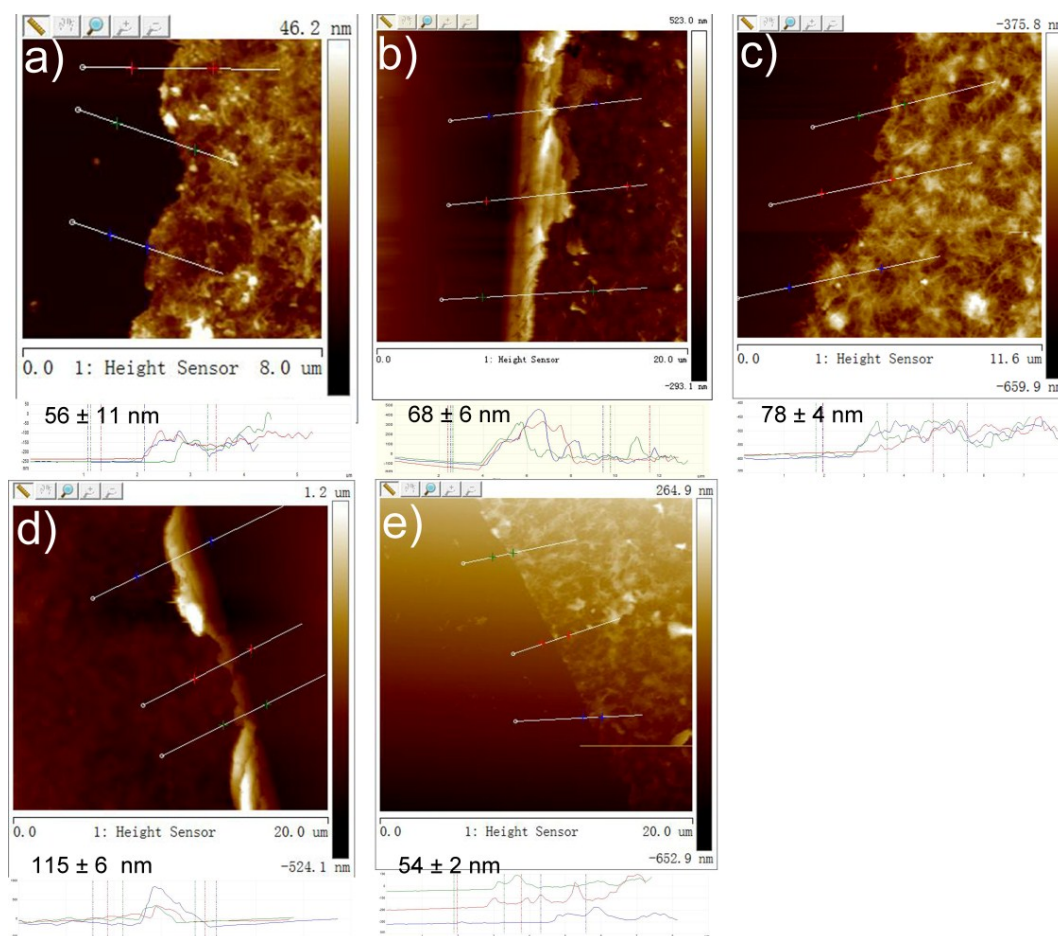

**Figure S3.** AFM cross-sectional images and analysis for (a) PS<sub>300</sub>S<sub>0</sub>, (b) PS<sub>300</sub>S<sub>10</sub>, (c) PS<sub>300</sub>S<sub>20</sub> (d) PS<sub>300</sub>S<sub>50</sub>, (e) PS<sub>0</sub>S<sub>50</sub> membranes. The surfaces were scratched with a razor to give SEM image contrast between the membrane and the Si substrate.

### 4. Apparatus for oil/water emulsions separation.

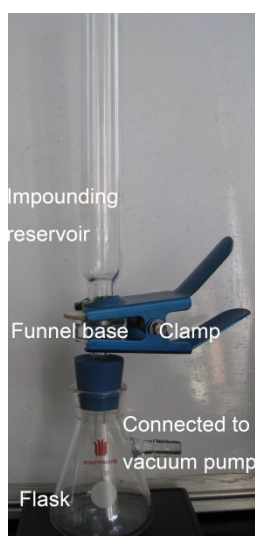

**Figure S4.** A digital photograph of pressure-driven oil/water emulsions separation apparatus.

## 5. Measurement of intrusion pressure.

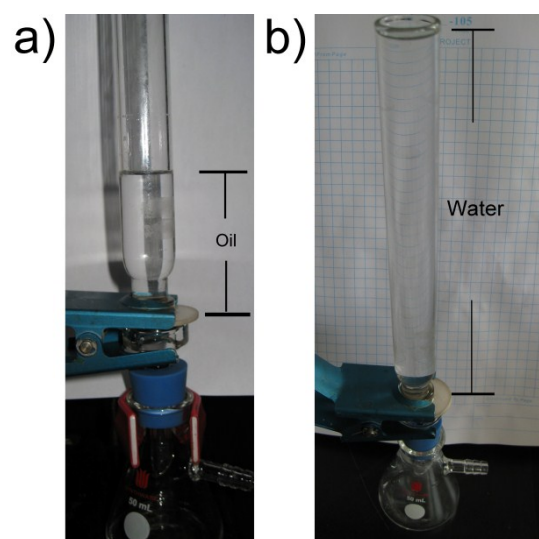

**Figure S5.** The measurements of intrusion pressure of (a) oil (chloroform as a symbol) and (b) water. As shown in Figure S5, a PS<sub>300</sub>S<sub>50</sub> bilayer membrane can support 0.081 N of chloroform or 0.47 N of water without permeation. Effective filtration area is 0.785 cm<sup>2</sup>. Therefore, the intrusion pressure of oil and water are ~ 0.01, ~ 0.06 bar, respectively.

## 6. Digital photographs and DLS data of water-in-cyclohexane and water-in-chloroform emulsions.

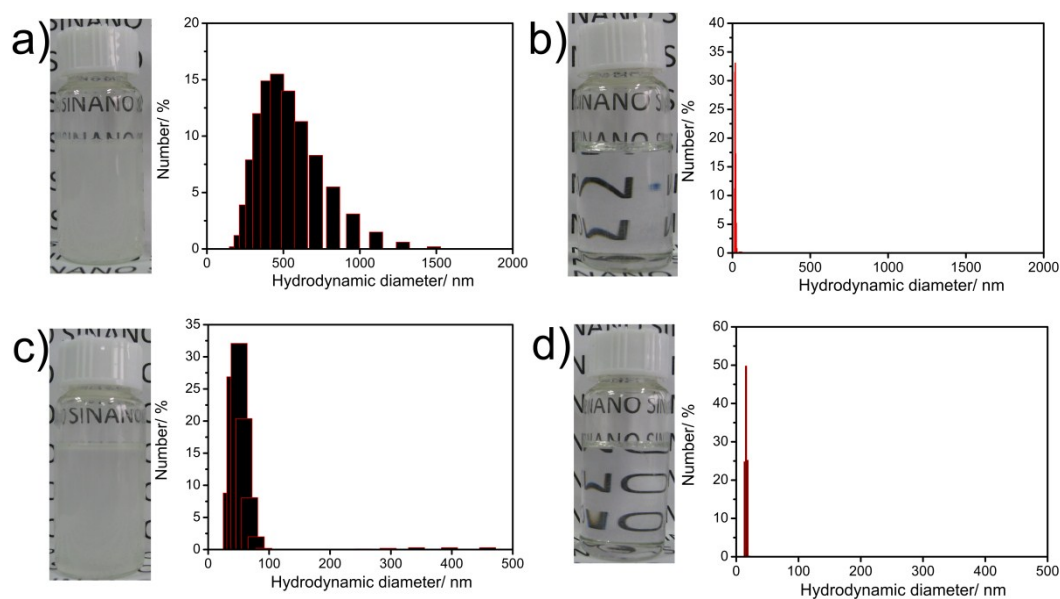

**Figure S6.** Digital photographs and DLS data of (upper) water-in-cyclohexane emulsion and (down) water-in-chloroform emulsion (a, c) before and (b, d) after filtration.

### 7. Variation of permeation flux as a function of SPAN 80 concentration in isooctane.

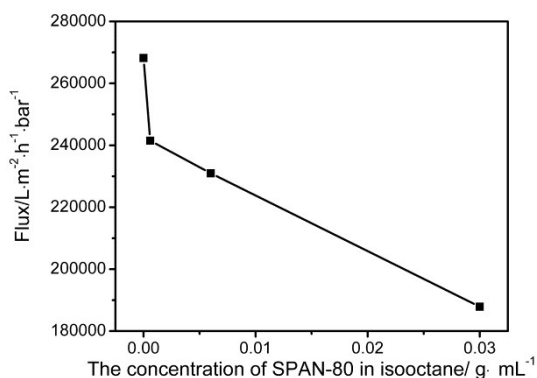

**Figure S7.** The variation of permeation flux as a function of SPAN 80 concentration in isooctane. A desired SPAN 80 was dissolved in isooctane without adding water. 5 mL of the solution was allowed to penetrate through a bilayer membrane. In this study, the concentration of SPAN 80 was in the range of 0.2 – 0.8 mg·mL<sup>-1</sup>. As shown in Figure S7,  $J$  is decreased with increasing the concentration of SPAN-80 in isooctane. The concentration of SPAN 80 in this study is in range of 0.2 – 0.8 mg·mL<sup>-1</sup>. And  $J \approx 260000$  (0.2 mg·mL<sup>-1</sup>), 235000 (0.8 mg·mL<sup>-1</sup>), respectively. Therefore, 0.8 mg·mL<sup>-1</sup> of SPAN-80 may result in a decrease in  $J$  by  $\sim 9.6\%$  so that we infer SPAN has much less influence in  $J$ .

### 8. Digital photographs and optical microscopy images of isooctane-in-water and *n*-hexane-in-water emulsions before and after filtration.

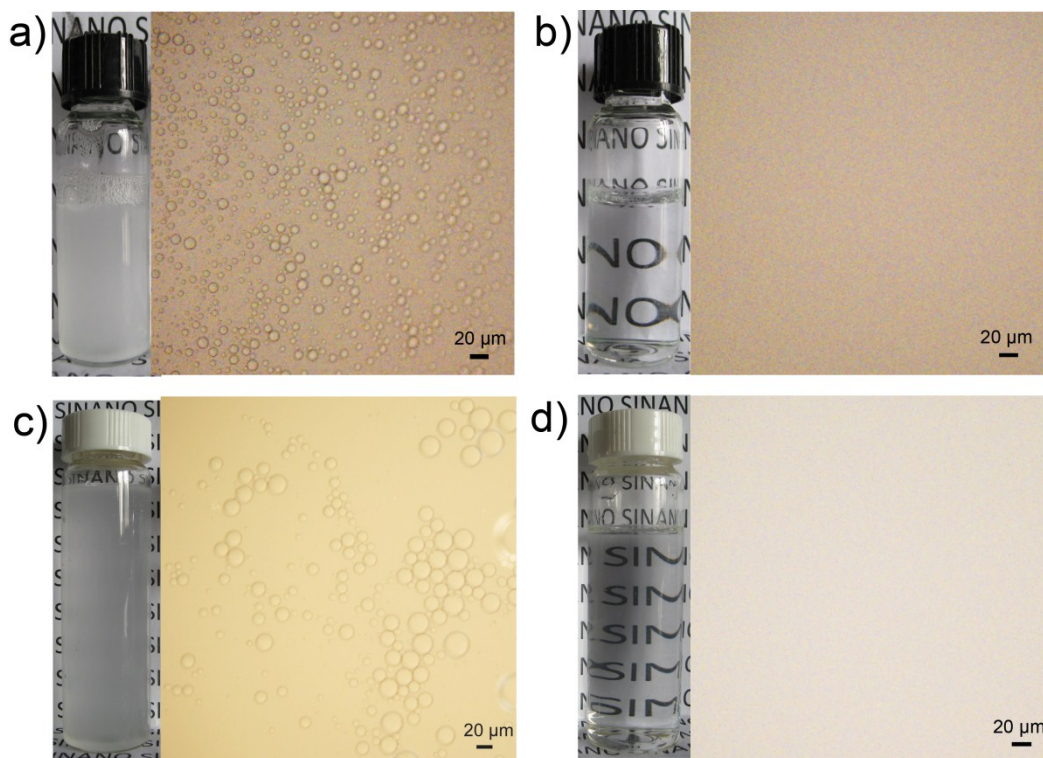

**Figure S8.** Digital photographs and optical microscopy images of (upper) isooctane-in-water emulsion and (down) *n*-hexane-in-water emulsion (a, c) before and (b, d) after filtration.

**9.** Analysis of forces acting on an oil droplet when permeating the bilayer membrane.

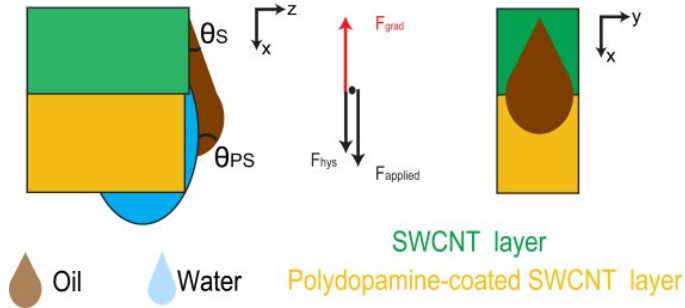

**Figure S9.** A schematic illustration regarding forces acting on an oil droplet. As shown in Figure S9,  $F_{grad} = \gamma_{lg}(\cos\theta_s - \cos\theta_{ps})$  where  $\gamma_{lg}$  is the surface tension at oil–air interface,  $\cos\theta_s$  and  $\cos\theta_{ps}$  are the oil contact angles at the SWCNT surface and underwater polydopamine-coated SWCNT surface, respectively. Additionally, surface hysteresis provides an opposite energy barrier:  $F_{hys} = \gamma_{lg} \int (\cos\theta_{ad,s} - \cos\theta_{re,ps}) dy$  where  $\cos\theta_{ad,s}$  and  $\cos\theta_{re,ps}$  are the advancing and receding contact angles at the SWCNT surface and underwater polydopamine-coated SWCNT surface, respectively,  $dy$  is the thickness of an oil droplet.

The total force applied on an oil droplet can be estimated:

$$F_{total} = F_{applied} - (F_{grad} - F_{hys})$$

We further define  $F_{grad} - F_{hys} = F_{asy}$ , therefore

$$F_{total} = F_{applied} - F_{asy}$$

Despite we acknowledged that  $F_{total}$  could be obtained quantitatively, but the results suggest that a desired  $F_{asy}$  could make oil droplet difficult penetrating the polydopamine-coated SWCNT layer.

## 10. Variation of permeation flux as a function of emulsifier concentration in water.

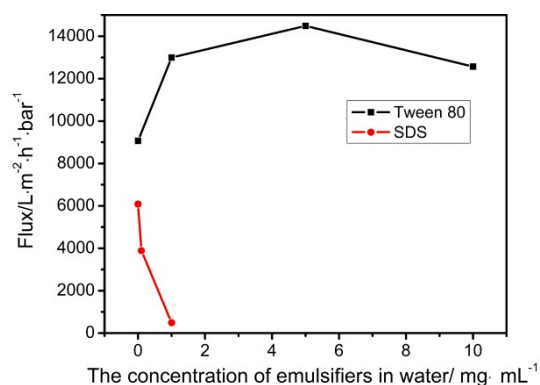

**Figure S10.** The variation of permeation flux as a function of emulsifier concentration in water. A desired tween 80 or SDS was dissolved in water without adding any oil. 5 mL of the solution was allowed to penetrate through a bilayer membrane. As shown in Figure S10, less amount of tween 80 reduces the surface tension of water, thus yielding a higher  $J$ . However,  $J$  is decreased when the concentration of tween 80 is raised above 6 mg·mL<sup>-1</sup>. This reduced  $J$  might be caused by the membrane's fouling. Considering the amount of tween 80 used in this study, we found that 1 mg·mL<sup>-1</sup> of tween 80 may result in an increase in  $J$  by 43.3 %. And 10 mg·mL<sup>-1</sup> of Tween 80 yields an increase in  $J$  by 38.6 %. By contrast, SDS severely fouls the membrane, resulting in a sharp decrease in  $J$  by 35.6% (1 mg·mL<sup>-1</sup>).

11.

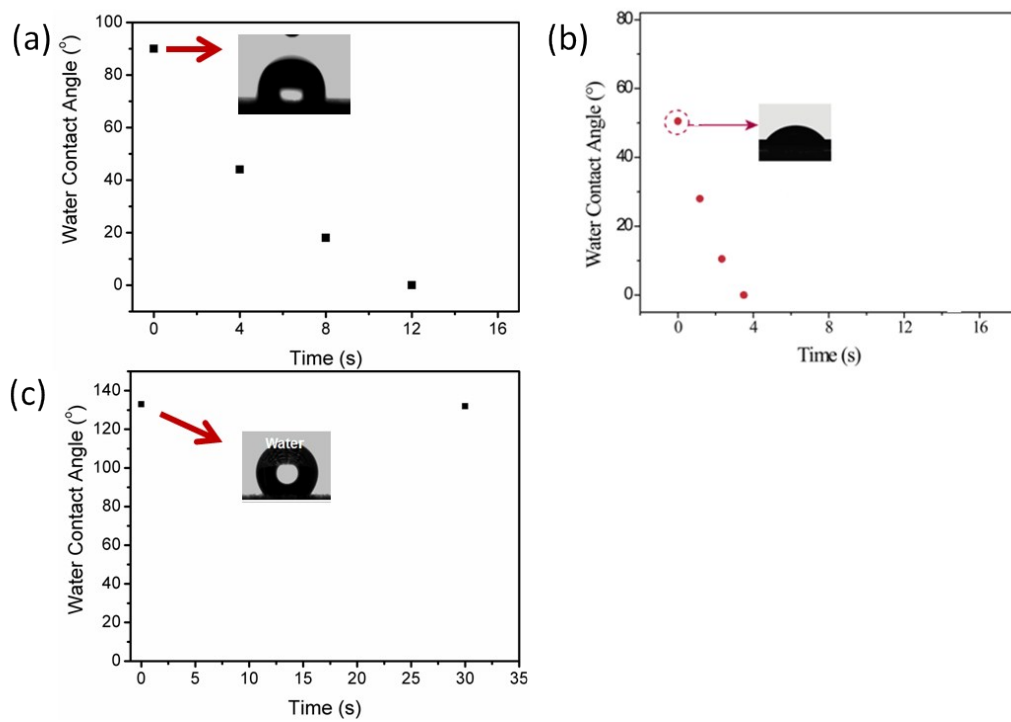

**Figure S11.** Surface wettability of (a) ceramic membrane, (b) MCE, and (c) copper mesh.

**Table S1.** Digital photographs of the filtrate for W/I and C/W emulsion passing through different membranes. The P applied is modulated according to the description in the manuscript.

Copper mesh + bilayer membrane: copper mesh supported bilayer membrane;  
MCE + bilayer membrane: MCE membrane supported bilayer membrane.

| Emulsion | Copper mesh + bilayer membrane                                                    | MCE + Bilayer membrane                                                            | Ceramic membrane                                                                  | MCE                                                                               | Copper mesh                                                                        |
|----------|-----------------------------------------------------------------------------------|-----------------------------------------------------------------------------------|-----------------------------------------------------------------------------------|-----------------------------------------------------------------------------------|------------------------------------------------------------------------------------|
| W/I      |  |  |  |  |  |
| C/W      |  |  |  |  |  |

**Table S2.** Digital photographs of the filtrate for W/I and C/W emulsion passing through different membranes.

| Hydrophilic ceramic membrane + hydrophobic SWCNT                                           | Hydrophobic copper mesh + hydrophilic PD@SWCNT                                             |
|--------------------------------------------------------------------------------------------|--------------------------------------------------------------------------------------------|
| C/W<br> | W/I<br> |
